# Supplementary material
Source: PubMed Central journal article supplement (PMC9236708)

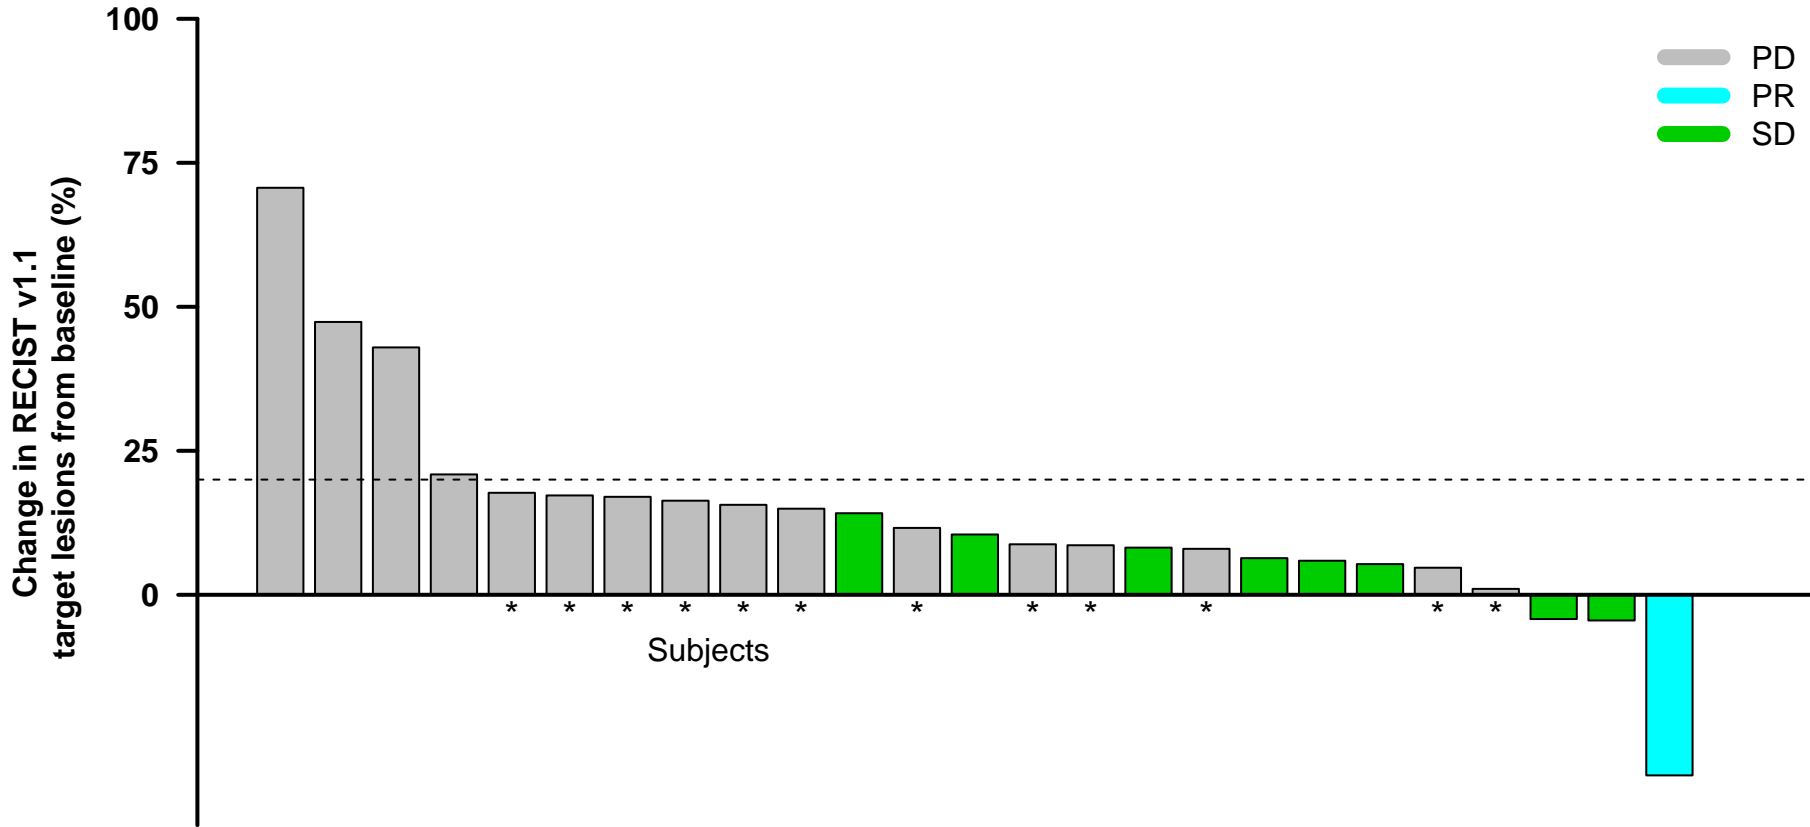

Supplement: NIHMS1812084-supplement-Supplemental_Figure_1A.pdf [file NIHMS1812084-supplement-Supplemental_Figure_1A.pdf]
